# Supplementary material
Source: Springer Nature journal article supplement (https://www.springermedizin.de/resource/supplementary/12885_2010_2744_MOESM4_ESM.pdf/9461858)

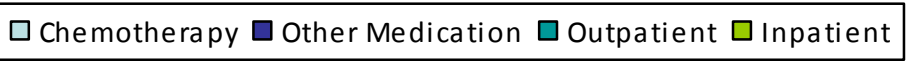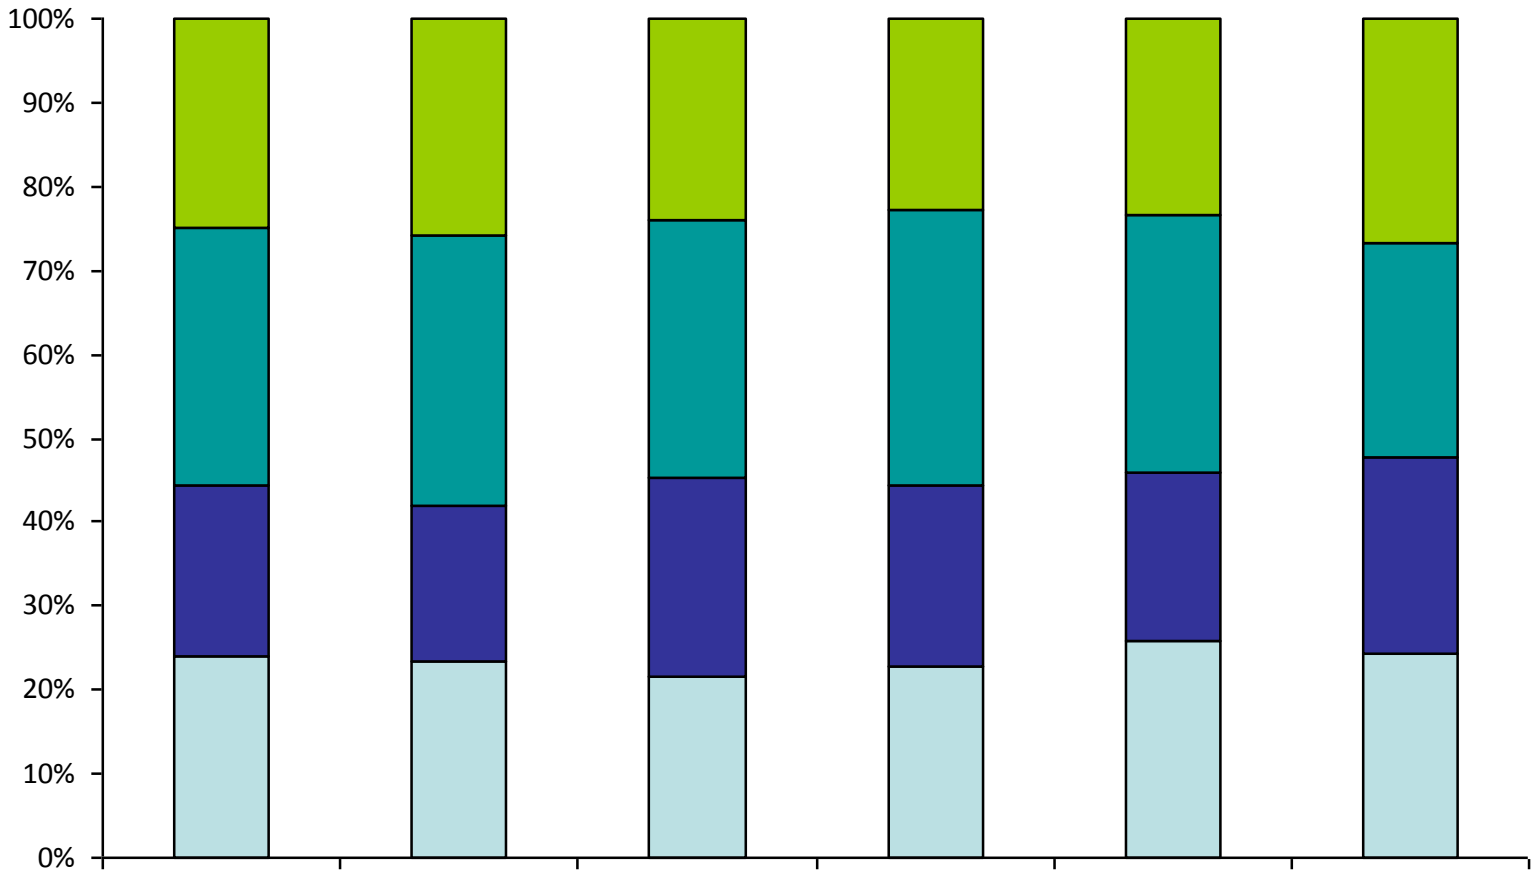

Total Follow-Up Costs (USD) (000s)

Patients

203

190

131

108

204

121

Supplement: MOESM4 [file 9461858]
